# Supplementary material for: Kinematics of the Normal Knee during Dynamic Activities: A Synthesis of Data from Intracortical Pins and Biplane Imaging
Source: Hindawi journal article supplement (doi:10.1155/2017/1908618), 2017-01-01

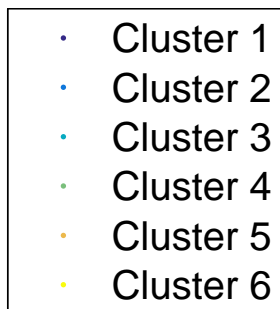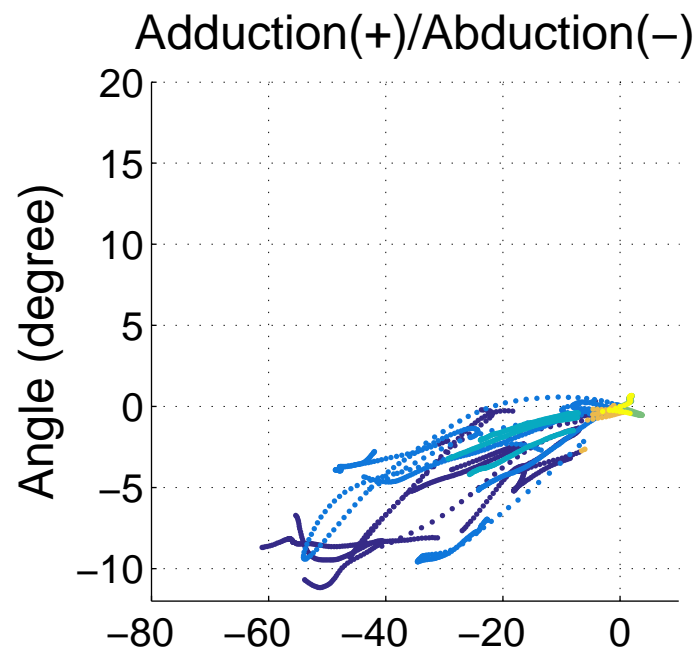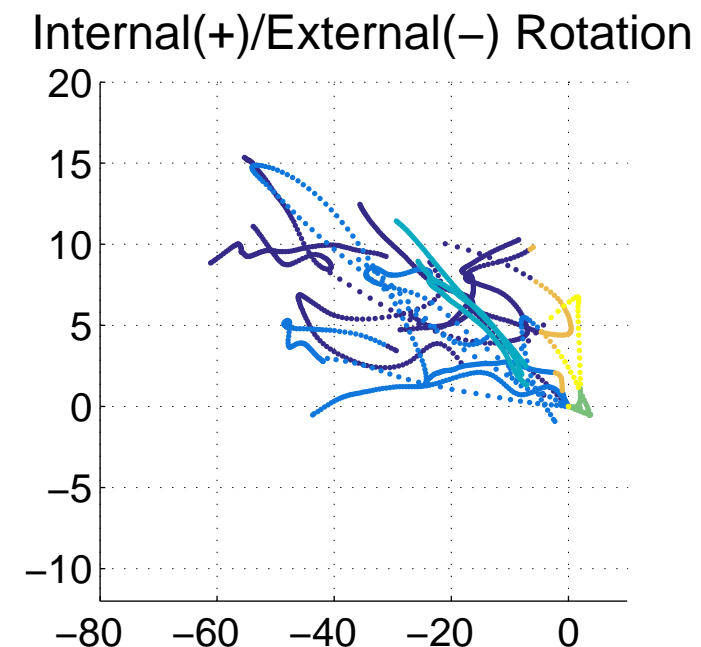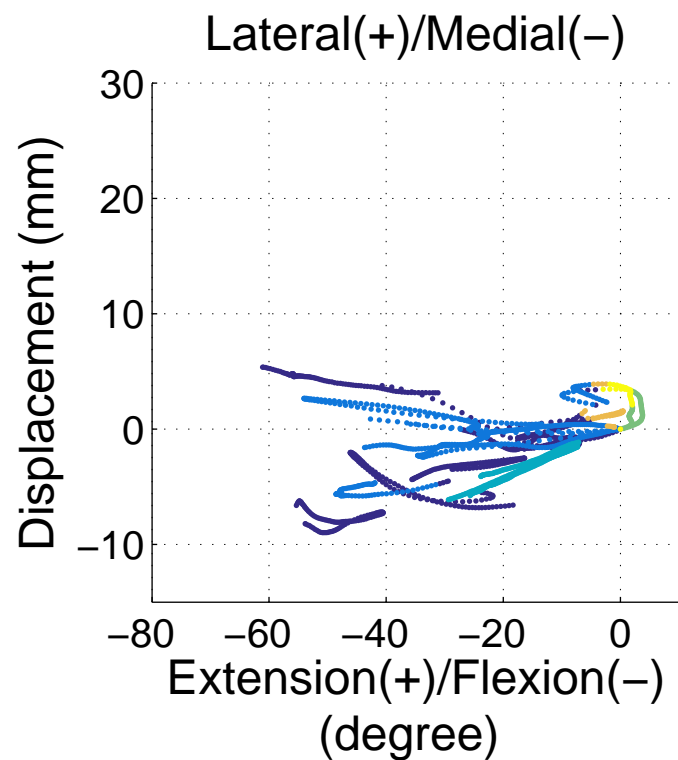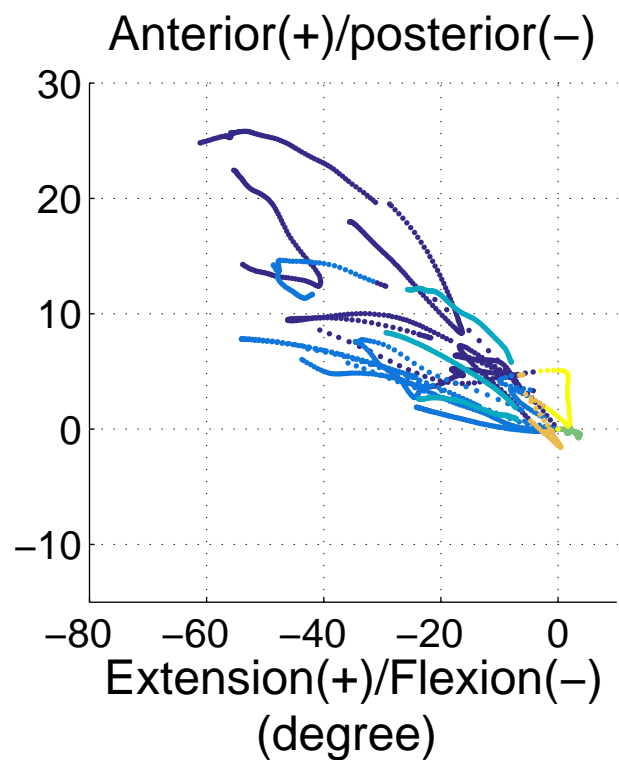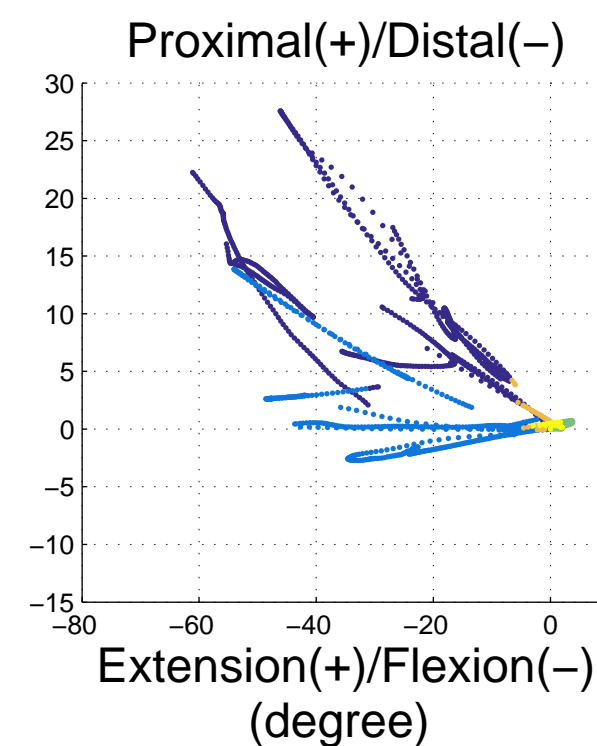

Supplement: f1 [file 1908618.f1.pdf]
