# Supplementary material for: Kinematics of the Normal Knee during Dynamic Activities: A Synthesis of Data from Intracortical Pins and Biplane Imaging
Source: Appl Bionics Biomech. 2017 Apr 11;2017:1908618. doi: 10.1155/2017/1908618 (PMC5405570; doi:10.1155/2017/1908618)
Supplement: Supplementary file 2 [file 1908618.f2.xls]

## Sheet: Lafortune92_Walk
Ext(+)/Flex(-)	Add(+)/Abd(-)	Int(+)/Ext(-) Rot	Lat(+)/Med(-)	Ant(+)/Post(-)	Prox(+)/Dist(-)
0	7.95139e-16	1.59028e-15	0	0	0
-0.689873	-0.0325953	0.24752	-0.177473	0.391432	0.348784
-1.32693	-0.0635782	0.480363	-0.306364	0.782107	0.664783
-1.94029	-0.0945354	0.707453	-0.410782	1.17023	0.965222
-2.558	-0.127001	0.937227	-0.513602	1.55411	1.26649
-3.18916	-0.161558	1.16918	-0.615238	1.93424	1.56978
-3.82955	-0.198103	1.39615	-0.699436	2.313	1.86509
-4.49659	-0.237493	1.61866	-0.769324	2.69312	2.15599
-5.2073	-0.280601	1.84024	-0.833451	3.07476	2.4492
-5.95047	-0.327156	2.06377	-0.891954	3.45036	2.74362
-6.7173	-0.377129	2.29499	-0.945796	3.81412	3.03815
-7.5089	-0.431039	2.54299	-0.999212	4.16463	3.33357
-8.32172	-0.48851	2.80752	-1.05673	4.5021	3.62875
-9.14673	-0.548521	3.0829	-1.12164	4.82706	3.921
-9.96592	-0.609939	3.36797	-1.191	5.13746	4.20639
-10.7621	-0.671625	3.66073	-1.26176	5.43086	4.48127
-11.5264	-0.732523	3.95426	-1.33482	5.70578	4.74356
-12.257	-0.792238	4.24258	-1.40859	5.96182	4.9917
-12.9569	-0.85098	4.52226	-1.4783	6.19934	5.22435
-13.6138	-0.908318	4.79712	-1.53831	6.41638	5.43822
-14.2123	-0.963353	5.06814	-1.58409	6.6108	5.63027
-14.753	-1.01472	5.31313	-1.61629	6.7839	5.80181
-15.2406	-1.06148	5.51732	-1.63695	6.9352	5.95454
-15.6792	-1.10353	5.68671	-1.64834	7.05999	6.08894
-16.058	-1.14002	5.8273	-1.64982	7.1524	6.20206
-16.3585	-1.16959	5.94334	-1.63938	7.20755	6.28927
-16.5842	-1.19199	6.03787	-1.6211	7.22988	6.35231
-16.743	-1.20699	6.10772	-1.60079	7.22537	6.39399
-16.831	-1.21339	6.13508	-1.58267	7.1947	6.41367
-16.8501	-1.21144	6.12334	-1.56706	7.13816	6.41185
-16.8102	-1.20332	6.1033	-1.5497	7.05676	6.39109
-16.7144	-1.19013	6.08272	-1.52641	6.95306	6.35206
-16.5638	-1.17239	6.05569	-1.4927	6.83083	6.29486
-16.3716	-1.15135	6.02227	-1.44204	6.69494	6.22243
-16.1455	-1.12788	5.9835	-1.37105	6.54732	6.13648
-15.8751	-1.10172	5.93888	-1.28378	6.38362	6.03503
-15.5658	-1.07345	5.88909	-1.18461	6.20394	5.9198
-15.2368	-1.04441	5.83588	-1.07693	6.01261	5.79557
-14.8802	-1.01439	5.77953	-0.960422	5.80902	5.66032
-14.4781	-0.982561	5.71983	-0.834081	5.59043	5.50971
-14.0187	-0.948422	5.6573	-0.700184	5.35497	5.34211
-13.498	-0.912058	5.59302	-0.563831	5.10264	5.15788
-12.9223	-0.874381	5.52871	-0.432933	4.83601	4.95975
-12.3062	-0.83673	5.46552	-0.309699	4.55925	4.75148
-11.6691	-0.80057	5.40363	-0.191922	4.27692	4.537
-11.0227	-0.76663	5.34053	-0.0769606	3.99032	4.31744
-10.3773	-0.735375	5.27354	0.036439	3.69982	4.0939
-9.74495	-0.707259	5.20189	0.145892	3.40624	3.86962
-9.13761	-0.682649	5.12707	0.24803	3.11184	3.64878
-8.56574	-0.661754	5.05263	0.339244	2.82029	3.43597
-8.03033	-0.644139	4.98039	0.418459	2.53431	3.23331
-7.52562	-0.628864	4.91075	0.487175	2.25533	3.04105
-7.03965	-0.614382	4.84251	0.551506	1.98216	2.85753
-6.56179	-0.599029	4.77585	0.617251	1.71391	2.68157
-6.08659	-0.58124	4.71411	0.687304	1.45139	2.51375
-5.61071	-0.560049	4.65968	0.759851	1.19551	2.35424
-5.13243	-0.53507	4.61338	0.829885	0.947044	2.20258
-4.65201	-0.506387	4.57321	0.896915	0.706191	2.05687
-4.17103	-0.474509	4.53656	0.962278	0.4728	1.91501
-3.69254	-0.440656	4.50269	1.02701	0.246448	1.77584
-3.21863	-0.406514	4.47196	1.08997	0.026893	1.6388
-2.74969	-0.374234	4.44573	1.14726	-0.185813	1.50387
-2.28586	-0.345991	4.42498	1.19693	-0.391769	1.37129
-1.82999	-0.323824	4.41036	1.23969	-0.590607	1.24165
-1.3986	-0.30912	4.40286	1.28253	-0.779071	1.11643
-1.00648	-0.302509	4.40333	1.33036	-0.954207	0.9971
-0.655594	-0.30338	4.41205	1.37935	-1.11545	0.884514
-0.349479	-0.310372	4.42989	1.42539	-1.25761	0.780403
-0.0945251	-0.321448	4.45822	1.46551	-1.37126	0.687426
0.108032	-0.334051	4.49744	1.499	-1.45512	0.607789
0.259877	-0.345684	4.54765	1.52594	-1.51242	0.542834
0.363667	-0.354956	4.60967	1.54537	-1.5475	0.49169
0.425515	-0.361055	4.68402	1.55461	-1.56373	0.453287
0.456185	-0.363796	4.77067	1.54895	-1.56213	0.427141
0.455569	-0.364365	4.87277	1.52891	-1.53812	0.414366
0.416281	-0.365016	4.99531	1.49939	-1.48493	0.417229
0.341579	-0.368113	5.13877	1.46507	-1.40847	0.437512
0.234021	-0.375863	5.30087	1.4292	-1.31439	0.476324
0.0835267	-0.389955	5.47663	1.39149	-1.19486	0.533476
-0.117218	-0.411122	5.66156	1.35134	-1.0417	0.608249
-0.368898	-0.438932	5.8525	1.30872	-0.849309	0.699512
-0.666124	-0.47227	6.04811	1.2656	-0.614375	0.806072
-1.00294	-0.509692	6.24762	1.22458	-0.335513	0.927031
-1.38618	-0.549963	6.44808	1.18579	-0.014166	1.06291
-1.83589	-0.592305	6.64765	1.14789	0.352464	1.21551
-2.38973	-0.636721	6.84794	1.10815	0.77658	1.38834
-3.05422	-0.682918	7.05015	1.06509	1.25925	1.58284
-3.80612	-0.730407	7.25521	1.0186	1.79074	1.79868
-4.63768	-0.780037	7.46746	0.969005	2.3684	2.0386
-5.55302	-0.833633	7.69156	0.916643	2.99317	2.30671
-6.56999	-0.894195	7.92801	0.861354	3.66639	2.60706
-7.70663	-0.964492	8.17547	0.802424	4.38836	2.94352
-8.97545	-1.0465	8.43088	0.738444	5.15721	3.31946
-10.3673	-1.14096	8.68706	0.667858	5.9661	3.73411
-11.8628	-1.248	8.93561	0.588809	6.80563	4.18451
-13.4704	-1.36888	9.17743	0.498187	7.67175	4.67208
-15.2011	-1.50504	9.41333	0.393388	8.55912	5.1986
-17.0481	-1.65749	9.63626	0.274131	9.45477	5.76322
-18.9969	-1.82639	9.84055	0.142719	10.347	6.36412
-21.027	-2.01106	10.0234	0.00403165	11.227	6.99884

## Sheet: Benoit06_Walk
Ext(+)/Flex(-)	Add(+)/Abd(-)	Int(+)/Ext(-) Rot	Lat(+)/Med(-)	Ant(+)/Post(-)	Prox(+)/Dist(-)
-8.48949	-3.19905	10.2761	-0.637752	4.62206	4.34505
-8.65357	-3.21897	10.2481	-0.673325	4.63745	4.40649
-9.03127	-3.26542	10.1857	-0.752142	4.67233	4.55091
-9.40491	-3.31228	10.1247	-0.828607	4.70634	4.6967
-9.83393	-3.36764	10.0561	-0.913736	4.7448	4.86953
-10.2737	-3.42692	9.98688	-0.997868	4.78386	5.0548
-10.7261	-3.49139	9.91593	-1.0813	4.82356	5.25603
-11.181	-3.56059	9.84394	-1.16187	4.86283	5.47195
-11.6377	-3.63496	9.77033	-1.23851	4.90104	5.70331
-12.0947	-3.71458	9.69479	-1.31019	4.9375	5.9498
-12.5505	-3.79931	9.61722	-1.3761	4.97145	6.21006
-13.0046	-3.88885	9.53745	-1.43582	5.00258	6.48156
-13.4558	-3.98274	9.45524	-1.48922	5.03096	6.7609
-13.9023	-4.08014	9.37022	-1.53648	5.05673	7.0447
-14.3418	-4.17988	9.28235	-1.57761	5.0802	7.3295
-14.7723	-4.28056	9.19225	-1.61206	5.10187	7.61214
-15.1904	-4.38039	9.10135	-1.63892	5.12203	7.88958
-15.5913	-4.47734	9.01177	-1.65772	5.14073	8.15874
-15.9708	-4.56982	8.92626	-1.66846	5.15803	8.41703
-16.3251	-4.65669	8.84716	-1.67186	5.17376	8.66256
-16.6502	-4.737	8.77598	-1.66951	5.18746	8.89374
-16.9428	-4.81029	8.71334	-1.66353	5.1986	9.1095
-17.2018	-4.87667	8.65906	-1.65586	5.20686	9.30958
-17.4266	-4.93635	8.61201	-1.64804	5.21204	9.49358
-17.6169	-4.98964	8.57086	-1.64093	5.21411	9.6612
-17.774	-5.03706	8.5344	-1.63455	5.21341	9.81268
-17.901	-5.07917	8.50158	-1.62828	5.21042	9.94857
-18.0007	-5.11625	8.47141	-1.62118	5.20554	10.0694
-18.076	-5.14828	8.44322	-1.61232	5.19912	10.1759
-18.1303	-5.17489	8.41669	-1.60119	5.19155	10.2684
-18.1653	-5.19548	8.39165	-1.58784	5.18296	10.3464
-18.1817	-5.2094	8.36802	-1.57278	5.17347	10.4088
-18.18	-5.21608	8.34582	-1.55685	5.16282	10.4544
-18.1603	-5.21519	8.32512	-1.54097	5.15041	10.4815
-18.1226	-5.20672	8.30578	-1.52591	5.13538	10.4888
-18.0682	-5.19075	8.28758	-1.51216	5.11692	10.4755
-17.9992	-5.16753	8.27022	-1.50009	5.09419	10.4417
-17.9183	-5.13744	8.25348	-1.49002	5.06702	10.3877
-17.8285	-5.10099	8.23729	-1.48223	5.03614	10.3145
-17.7333	-5.05882	8.22164	-1.47702	5.00288	10.2242
-17.635	-5.01182	8.20669	-1.47474	4.96887	10.1193
-17.5352	-4.9609	8.19271	-1.47583	4.93596	10.0024
-17.4349	-4.9069	8.17979	-1.48046	4.90578	9.87672
-17.3347	-4.85054	8.16789	-1.48875	4.87918	9.7454
-17.2346	-4.79227	8.15681	-1.50083	4.8564	9.61118
-17.1351	-4.73239	8.14611	-1.51677	4.83733	9.47584
-17.0377	-4.67115	8.13506	-1.53634	4.82152	9.34088
-16.9436	-4.60879	8.12284	-1.55922	4.80828	9.20721
-16.8539	-4.54562	8.10833	-1.58475	4.79706	9.07521
-16.77	-4.48204	8.09019	-1.61176	4.78755	8.9449
-16.6924	-4.4183	8.06699	-1.63853	4.77951	8.81687
-16.6209	-4.35452	8.03742	-1.66318	4.77264	8.69132
-16.5551	-4.29081	8.00036	-1.68388	4.76664	8.56834
-16.4944	-4.22721	7.95523	-1.69914	4.76109	8.44831
-16.4388	-4.16399	7.90203	-1.70789	4.75543	8.33236
-16.3884	-4.10181	7.84126	-1.70964	4.74899	8.22191
-16.344	-4.04155	7.77372	-1.70398	4.74118	8.11938
-16.3062	-3.98424	7.70047	-1.69049	4.73171	8.0279
-16.2758	-3.93106	7.62262	-1.66896	4.72049	7.95047
-16.2532	-3.88296	7.54132	-1.63963	4.7077	7.88893
-16.2385	-3.8405	7.4579	-1.60334	4.69392	7.84412
-16.2313	-3.80402	7.37366	-1.56228	4.68008	7.8152
-16.2315	-3.77352	7.28971	-1.52005	4.66708	7.79992
-16.2388	-3.74863	7.20698	-1.48067	4.65601	7.79529
-16.2534	-3.72882	7.12608	-1.44815	4.64797	7.79835
-16.2757	-3.7135	7.04721	-1.42602	4.64356	7.8062
-16.3066	-3.70205	6.9704	-1.41646	4.64288	7.81666
-16.3477	-3.69392	6.89581	-1.41979	4.64569	7.82843
-16.4011	-3.6887	6.82354	-1.43522	4.65094	7.84121
-16.4683	-3.68603	6.75343	-1.46106	4.65706	7.85573
-16.5514	-3.68577	6.68498	-1.49496	4.6625	7.87382
-16.652	-3.68793	6.61723	-1.53429	4.66573	7.89833
-16.7708	-3.69292	6.5486	-1.57666	4.66508	7.93277
-16.9082	-3.70154	6.4772	-1.61981	4.65875	7.9808
-17.0652	-3.71513	6.40144	-1.66178	4.64507	8.0458
-17.242	-3.73524	6.32031	-1.70074	4.62238	8.13039
-17.4387	-3.76374	6.23326	-1.73527	4.58889	8.2364
-17.6555	-3.80241	6.14021	-1.76393	4.54326	8.36511
-17.8928	-3.85299	6.04137	-1.78514	4.48549	8.51804
-18.1507	-3.91736	5.93649	-1.79672	4.41601	8.69733
-18.4295	-3.9976	5.82471	-1.79612	4.33568	8.90637
-18.7311	-4.09581	5.70536	-1.78004	4.2463	9.14933
-19.0574	-4.21393	5.57857	-1.74506	4.15043	9.43108
-19.4104	-4.35341	5.44579	-1.68803	4.05085	9.75615
-19.7935	-4.5148	5.31079	-1.60735	3.95171	10.1279
-20.2097	-4.69773	5.18	-1.50316	3.85841	10.5483
-20.6602	-4.90104	5.06181	-1.37828	3.77661	11.0174
-21.1445	-5.12312	4.96483	-1.23768	3.71192	11.5317
-21.6617	-5.3619	4.8971	-1.08817	3.66927	12.0844
-22.2072	-5.61445	4.86449	-0.936815	3.65155	12.6665
-22.7729	-5.87638	4.8694	-0.790604	3.65972	13.2648
-23.3491	-6.14174	4.90998	-0.654559	3.69275	13.8652
-23.9245	-6.40325	4.98082	-0.532244	3.74743	14.4538
-24.4835	-6.65274	5.07374	-0.425409	3.81905	15.0174
-25.0121	-6.88309	5.17924	-0.33447	3.90223	15.5448
-25.4992	-7.08972	5.2878	-0.258244	3.99088	16.0295
-25.9339	-7.26903	5.39082	-0.195768	4.07847	16.4625
-26.3188	-7.42406	5.4853	-0.14432	4.16252	16.8498
-26.6285	-7.54688	5.56195	-0.104779	4.23305	17.1639
-26.9247	-7.66293	5.63512	-0.0679389	4.30226	17.4665

## Sheet: Benoit07_Walk
Ext(+)/Flex(-)	Add(+)/Abd(-)	Int(+)/Ext(-) Rot	Lat(+)/Med(-)	Ant(+)/Post(-)	Prox(+)/Dist(-)
-5.98659	-2.62961	9.82632	1.59389	4.70955	3.83006
-6.15916	-2.66615	9.78193	1.51589	4.69727	3.95471
-6.57114	-2.74459	9.68429	1.34336	4.68387	4.23477
-6.98994	-2.8191	9.59036	1.17743	4.68059	4.50843
-7.49039	-2.89932	9.48729	0.994944	4.69437	4.81762
-8.03068	-2.9754	9.38792	0.818366	4.73356	5.13045
-8.6183	-3.04867	9.29206	0.647442	4.80144	5.4529
-9.24567	-3.11909	9.20206	0.485722	4.89928	5.78339
-9.91348	-3.18872	9.11777	0.331382	5.02595	6.12657
-10.6204	-3.25962	9.03878	0.181758	5.17839	6.48466
-11.3634	-3.33347	8.96452	0.0346167	5.3513	6.85539
-12.1349	-3.4113	8.8941	-0.111265	5.53668	7.23139
-12.9205	-3.49326	8.82606	-0.254307	5.72462	7.60176
-13.6989	-3.57837	8.75843	-0.389496	5.90419	7.95423
-14.4452	-3.66435	8.68908	-0.509956	6.06436	8.27761
-15.1334	-3.74757	8.61604	-0.609921	6.19604	8.56373
-15.7407	-3.82361	8.53799	-0.6855	6.2944	8.80819
-16.2531	-3.88818	8.45468	-0.736335	6.35941	9.00955
-16.6675	-3.93825	8.36715	-0.766158	6.39514	9.16781
-16.9883	-3.9725	8.27742	-0.781019	6.40816	9.28347
-17.225	-3.99141	8.18815	-0.786302	6.4065	9.35775
-17.3889	-3.99682	8.10223	-0.786176	6.3974	9.39249
-17.4892	-3.9912	8.02237	-0.78298	6.38558	9.39027
-17.5317	-3.97673	7.95077	-0.777014	6.37337	9.35512
-17.5212	-3.95507	7.88889	-0.767289	6.36176	9.29244
-17.4622	-3.92731	7.83706	-0.752705	6.35022	9.20742
-17.358	-3.89412	7.79454	-0.732485	6.33707	9.10442
-17.2118	-3.85581	7.7595	-0.706396	6.32035	8.98658
-17.025	-3.81251	7.72923	-0.674929	6.29846	8.85549
-16.7965	-3.76418	7.70064	-0.639339	6.27018	8.71137
-16.5248	-3.71065	7.67096	-0.601618	6.23554	8.55441
-16.2107	-3.65166	7.63806	-0.564158	6.19641	8.38561
-15.8583	-3.58694	7.60061	-0.529683	6.15622	8.2072
-15.4749	-3.51629	7.55819	-0.501028	6.11848	8.02243
-15.07	-3.43962	7.51106	-0.480746	6.08582	7.83506
-14.6532	-3.35703	7.46008	-0.470572	6.05959	7.64845
-14.2315	-3.26882	7.40651	-0.471588	6.03964	7.46463
-13.8095	-3.17547	7.35175	-0.48413	6.02449	7.28385
-13.3894	-3.07746	7.29666	-0.507621	6.01258	7.1048
-12.9725	-2.97509	7.24117	-0.540576	6.00308	6.92521
-12.5596	-2.86863	7.18405	-0.58112	5.99541	6.74255
-12.1516	-2.75862	7.12286	-0.62647	5.98858	6.55556
-11.75	-2.64598	7.05436	-0.672751	5.98094	6.36496
-11.3556	-2.5326	6.97578	-0.715568	5.96981	6.1735
-10.9693	-2.42154	6.88564	-0.750913	5.95104	5.98585
-10.5913	-2.31626	6.78365	-0.77545	5.91828	5.80782
-10.2214	-2.21951	6.67067	-0.787399	5.86443	5.64427
-9.85962	-2.13294	6.54835	-0.787006	5.78322	5.49869
-9.50671	-2.05665	6.41809	-0.776451	5.66991	5.37287
-9.16497	-1.98901	6.28059	-0.75912	5.52221	5.26634
-8.83865	-1.92765	6.13646	-0.738917	5.34417	5.17664
-8.5337	-1.87067	5.98659	-0.719753	5.14503	5.10029
-8.25611	-1.81686	5.83262	-0.705171	4.93587	5.03251
-8.0096	-1.76557	5.67722	-0.697779	4.72804	4.96765
-7.79511	-1.71659	5.52402	-0.699096	4.53254	4.90035
-7.61078	-1.66971	5.37691	-0.710068	4.35615	4.82649
-7.45255	-1.62445	5.23949	-0.731174	4.20143	4.74395
-7.31654	-1.58026	5.11465	-0.762484	4.06996	4.65351
-7.20178	-1.53704	5.00444	-0.803928	3.96392	4.55886
-7.10951	-1.49551	4.90972	-0.855398	3.88526	4.4655
-7.04115	-1.45702	4.83005	-0.916211	3.83568	4.37942
-6.99767	-1.42313	4.76356	-0.984777	3.81671	4.30594
-6.9782	-1.39519	4.70689	-1.05863	3.82809	4.24855
-6.98001	-1.37407	4.65569	-1.13463	3.86624	4.20855
-7.00111	-1.35989	4.60549	-1.20942	3.92548	4.18563
-7.04315	-1.35237	4.55288	-1.27994	3.99975	4.17878
-7.11152	-1.35121	4.49626	-1.344	4.08308	4.1868
-7.21572	-1.35625	4.43614	-1.40046	4.17022	4.20923
-7.36614	-1.36751	4.37453	-1.4491	4.25729	4.2468
-7.5704	-1.38514	4.31397	-1.49028	4.34073	4.3018
-7.83183	-1.40942	4.25653	-1.52478	4.41647	4.37794
-8.15052	-1.44074	4.20337	-1.55357	4.47979	4.48004
-8.52335	-1.47957	4.15447	-1.57756	4.52526	4.61371
-8.94691	-1.5266	4.10927	-1.59738	4.54706	4.78435
-9.41998	-1.58262	4.06708	-1.61328	4.54138	4.99484
-9.94314	-1.64845	4.02765	-1.62467	4.50727	5.24496
-10.5168	-1.72493	3.99133	-1.62979	4.44628	5.53194
-11.1415	-1.81332	3.95919	-1.62594	4.36336	5.85102
-11.8187	-1.91594	3.93289	-1.60953	4.26709	6.19785
-12.5552	-2.03664	3.91538	-1.57599	4.16745	6.57318
-13.3631	-2.18114	3.91034	-1.5207	4.07567	6.984
-14.2569	-2.3562	3.92146	-1.4395	4.00334	7.44229
-15.25	-2.56784	3.95245	-1.32803	3.96022	7.96428
-16.3494	-2.81962	4.00671	-1.18157	3.95331	8.56992
-17.5413	-3.11152	4.08547	-0.996554	3.98752	9.27156
-18.797	-3.43942	4.18846	-0.769959	4.06416	10.0709
-20.0903	-3.79787	4.31573	-0.498841	4.18389	10.9664
-21.4056	-4.18151	4.4675	-0.182328	4.3489	11.9523
-22.7377	-4.58561	4.64399	0.175883	4.56181	13.0084
-24.1033	-5.0062	4.84683	0.569688	4.82358	14.1176
-25.5342	-5.43974	5.07816	0.990251	5.13463	15.2723
-27.0495	-5.87857	5.33887	1.42359	5.49139	16.4555
-28.6491	-6.31235	5.62905	1.85286	5.88464	17.6402
-30.328	-6.73084	5.94859	2.263	6.30173	18.8078
-32.0732	-7.12499	6.29668	2.63873	6.72973	19.9303
-33.8663	-7.48905	6.67302	2.96819	7.15651	20.9729
-35.6537	-7.81767	7.0669	3.24245	7.5634	21.8954
-37.4478	-8.11814	7.47785	3.46579	7.9477	22.7016
-39.0461	-8.36877	7.85376	3.63078	8.26994	23.3331
-40.6811	-8.61529	8.24393	3.77828	8.58192	23.9219

## Sheet: Kozanek09_Walk
Ext(+)/Flex(-)	Add(+)/Abd(-)	Int(+)/Ext(-) Rot	Lat(+)/Med(-)	Ant(+)/Post(-)	Prox(+)/Dist(-)
-2.31077	-0.0288597	-0.917756	2.32421	0.956173	0.836473
-2.54531	-0.00277164	-0.792138	2.36947	1.0226	0.808835
-3.06201	0.0519658	-0.510082	2.47094	1.17302	0.74838
-3.55946	0.100537	-0.232968	2.56884	1.32038	0.690433
-4.1055	0.149291	0.0822253	2.6776	1.48646	0.627092
-4.63168	0.191468	0.405763	2.78427	1.65158	0.565991
-5.13737	0.226316	0.746681	2.88852	1.81646	0.506458
-5.60751	0.251754	1.10633	2.98696	1.97794	0.449125
-6.03932	0.266236	1.49183	3.07845	2.13767	0.393023
-6.43129	0.268596	1.90662	3.16203	2.29809	0.337219
-6.78245	0.2583	2.34838	3.23711	2.4612	0.281184
-7.09374	0.235997	2.80902	3.30361	2.62724	0.224882
-7.36735	0.203508	3.27584	3.36197	2.79423	0.168836
-7.60413	0.163408	3.73342	3.4131	2.95804	0.114191
-7.80167	0.118025	4.16563	3.45841	3.11213	0.0625208
-7.95376	0.0704115	4.55691	3.49952	3.2488	0.0154291
-8.04839	0.0240169	4.893	3.5381	3.36063	-0.0255153
-8.06987	-0.018224	5.16148	3.57575	3.44072	-0.0587597
-8.00294	-0.0545492	5.35319	3.61377	3.48311	-0.0829632
-7.8342	-0.083383	5.46265	3.65285	3.48448	-0.0968533
-7.55232	-0.104643	5.48857	3.69314	3.44379	-0.0989138
-7.15273	-0.120098	5.43407	3.73429	3.36169	-0.0875226
-6.63867	-0.131918	5.30759	3.77527	3.24094	-0.0617611
-6.0231	-0.141258	5.12023	3.8145	3.08637	-0.0217334
-5.33087	-0.149886	4.88442	3.85005	2.90345	0.0311757
-4.59646	-0.159853	4.61313	3.87952	2.69838	0.0941189
-3.85399	-0.172187	4.31893	3.90023	2.47808	0.162998
-3.13204	-0.187314	4.01115	3.90955	2.24932	0.233606
-2.44792	-0.206014	3.69686	3.9052	2.01762	0.30223
-1.80475	-0.228156	3.38062	3.88578	1.78683	0.365963
-1.19681	-0.25268	3.06422	3.85107	1.55881	0.422919
-0.620268	-0.278731	2.7475	3.80172	1.33343	0.472285
-0.0760775	-0.305964	2.42988	3.73918	1.10965	0.513972
0.431914	-0.334052	2.11084	3.66547	0.887212	0.548474
0.899179	-0.362662	1.79192	3.58258	0.667954	0.576751
1.32371	-0.391425	1.47766	3.49237	0.455479	0.600071
1.70891	-0.419803	1.17428	3.39673	0.254649	0.619798
2.06191	-0.446916	0.889175	3.29753	0.0704132	0.637138
2.38633	-0.471733	0.629989	3.19642	-0.0937721	0.652979
2.67738	-0.493459	0.402202	3.09478	-0.236694	0.667855
2.92528	-0.511424	0.207994	2.99362	-0.358582	0.681932
3.12182	-0.524723	0.0472109	2.8935	-0.460643	0.695071
3.26269	-0.532624	-0.0825848	2.79455	-0.544493	0.706989
3.35136	-0.534911	-0.18581	2.69667	-0.611629	0.717352
3.40121	-0.53186	-0.267613	2.59968	-0.663343	0.725829
3.42953	-0.524314	-0.333041	2.50342	-0.701082	0.73216
3.44976	-0.513996	-0.386615	2.40776	-0.726519	0.736222
3.47036	-0.503063	-0.431601	2.31264	-0.741329	0.738034
3.49471	-0.493669	-0.469498	2.21804	-0.746877	0.737711
3.52163	-0.487446	-0.500261	2.12395	-0.744138	0.73541
3.54832	-0.48538	-0.522922	2.03039	-0.733845	0.731269
3.57337	-0.487706	-0.536581	1.93736	-0.716495	0.725335
3.59709	-0.493887	-0.541256	1.84483	-0.692675	0.717535
3.62075	-0.502591	-0.53834	1.75273	-0.663489	0.707725
3.64572	-0.512455	-0.530396	1.66099	-0.63056	0.695759
3.67247	-0.522221	-0.520422	1.56953	-0.595716	0.681519
3.69976	-0.530671	-0.510972	1.47827	-0.560749	0.66496
3.72455	-0.536858	-0.503629	1.38717	-0.527112	0.646106
3.74241	-0.54028	-0.49882	1.29617	-0.495548	0.624991
3.74847	-0.54056	-0.496016	1.20527	-0.466022	0.601616
3.73854	-0.53747	-0.494217	1.1145	-0.437902	0.575967
3.70997	-0.53101	-0.492375	1.02399	-0.410278	0.54803
3.66062	-0.521242	-0.489437	0.934028	-0.382245	0.517816
3.58768	-0.508163	-0.484304	0.845052	-0.353187	0.485396
3.48714	-0.491566	-0.475743	0.757611	-0.322916	0.450897
3.35288	-0.470939	-0.462352	0.672226	-0.291674	0.414455
3.17652	-0.445487	-0.442682	0.589243	-0.25999	0.376163
2.9506	-0.414406	-0.41557	0.508712	-0.228484	0.33598
2.67127	-0.377047	-0.380425	0.430316	-0.19763	0.293689
2.33847	-0.33292	-0.337301	0.353518	-0.167567	0.249021
1.95645	-0.28161	-0.286723	0.277973	-0.137996	0.201849
1.53149	-0.22279	-0.22902	0.203791	-0.108164	0.152286
1.0663	-0.156167	-0.163563	0.131652	-0.076852	0.101
0.558595	-0.0816781	-0.08838	0.0630302	-0.0419596	0.0495154
-3.94318e-18	3.97569e-16	0	0	0	0
-0.628069	0.0871345	0.10651	-0.0554983	0.053621	-0.0451445
-1.35276	0.176984	0.23637	-0.102025	0.124546	-0.0833931
-2.19929	0.265972	0.393663	-0.138812	0.219099	-0.112436
-3.19201	0.35001	0.581017	-0.166179	0.342566	-0.130614
-4.35221	0.424989	0.799359	-0.185462	0.497168	-0.136837
-5.68681	0.487205	1.04751	-0.198326	0.68243	-0.130321
-7.18097	0.533565	1.32297	-0.206414	0.895123	-0.110608
-8.812	0.561372	1.62379	-0.211111	1.12964	-0.077637
-10.5483	0.568266	1.9488	-0.212976	1.37978	-0.0317927
-12.3499	0.552157	2.29755	-0.211641	1.64082	0.0260255
-14.1783	0.510893	2.67072	-0.206184	1.90921	0.0943865
-16.0073	0.441948	3.06978	-0.195309	2.18258	0.17146
-17.8115	0.343169	3.49513	-0.177502	2.4595	0.255372
-19.5687	0.213092	3.94567	-0.151856	2.73879	0.344815
-21.2633	0.0508825	4.41915	-0.118456	3.01898	0.440057
-22.8863	-0.143464	4.91189	-0.0780597	3.29856	0.543334
-24.4344	-0.368861	5.41868	-0.0320989	3.5764	0.657943
-25.9173	-0.623818	5.93331	0.017566	3.85207	0.787427
-27.3558	-0.906753	6.44885	0.0696319	4.12611	0.934267
-28.7782	-1.21587	6.95744	0.123806	4.39984	1.09672
-30.2141	-1.54918	7.45094	0.18027	4.67494	1.26903
-31.6561	-1.89758	7.9137	0.238187	4.94727	1.44038
-33.1266	-2.26109	8.34559	0.298554	5.21958	1.6055
-34.4583	-2.59617	8.70421	0.353908	5.4621	1.7433
-35.8386	-2.95182	9.0505	0.411354	5.71131	1.87857

## Sheet: Li09_Walk
Ext(+)/Flex(-)	Add(+)/Abd(-)	Int(+)/Ext(-) Rot	Lat(+)/Med(-)	Ant(+)/Post(-)	Prox(+)/Dist(-)
-4.20467	0.321367	0.700588	2.07118	3.33846	0.146457
-4.76053	0.291465	0.765034	2.12762	3.38603	0.151691
-5.92766	0.223235	0.920553	2.25295	3.49396	0.163682
-6.99854	0.151925	1.07942	2.37391	3.60034	0.175846
-8.07752	0.0682164	1.27306	2.5075	3.7215	0.189987
-8.96058	-0.0174727	1.49061	2.63728	3.84456	0.204506
-9.6024	-0.104328	1.73972	2.76306	3.97061	0.219398
-9.93777	-0.188516	2.02262	2.88107	4.09767	0.234196
-9.93846	-0.267197	2.34482	2.99046	4.2263	0.24868
-9.59863	-0.336445	2.70979	3.09037	4.3565	0.262539
-8.93809	-0.391174	3.1179	3.17984	4.48739	0.275348
-8.00134	-0.425891	3.56552	3.2578	4.61697	0.286597
-6.85317	-0.435643	4.04279	3.32323	4.74138	0.295747
-5.57558	-0.417607	4.5324	3.37564	4.85534	0.302364
-4.25528	-0.372327	5.01291	3.41531	4.95372	0.306261
-2.9722	-0.303858	5.46218	3.44279	5.03148	0.307496
-1.79157	-0.218875	5.85921	3.45872	5.08395	0.306329
-0.760209	-0.125167	6.18832	3.46377	5.1074	0.30315
0.0932114	-0.0299869	6.44212	3.45806	5.09865	0.298348
0.757976	0.0611627	6.61924	3.44093	5.05396	0.292194
1.23792	0.144941	6.72231	3.41203	4.97001	0.284887
1.54715	0.220043	6.7576	3.37204	4.84467	0.276611
1.71028	0.286686	6.73264	3.32217	4.67795	0.267521
1.76215	0.34602	6.65358	3.2642	4.4727	0.257781
1.7425	0.399688	6.52551	3.20067	4.23474	0.247594
1.69058	0.449144	6.35231	3.13369	3.97221	0.237166
1.64009	0.494968	6.13563	3.06427	3.69435	0.226676
1.61321	0.536783	5.87519	2.99283	3.40946	0.216292
1.61811	0.573635	5.56991	2.91942	3.12371	0.206158
1.65115	0.604271	5.21932	2.84371	2.84077	0.196376
1.70255	0.627851	4.82542	2.76543	2.56137	0.186998
1.76143	0.644501	4.39357	2.68457	2.28408	0.178033
1.81898	0.655243	3.93337	2.60137	2.00686	0.169459
1.87012	0.661545	3.45858	2.51628	1.72873	0.16126
1.91336	0.664934	2.98468	2.42999	1.45096	0.153441
1.94888	0.666571	2.52702	2.34346	1.17744	0.146039
1.97713	0.667051	2.1	2.25791	0.914134	0.139116
1.99878	0.666437	1.71515	2.17452	0.668541	0.132734
2.01464	0.664505	1.38006	2.0943	0.447907	0.126928
2.02556	0.661034	1.09933	2.01791	0.257366	0.121689
2.03237	0.655922	0.873128	1.94561	0.0997348	0.116976
2.03555	0.649268	0.69719	1.87726	-0.0244587	0.112715
2.03487	0.641382	0.564136	1.81256	-0.117694	0.108826
2.02903	0.632665	0.464694	1.75107	-0.184635	0.105228
2.01574	0.623428	0.388463	1.69234	-0.230768	0.101857
1.99228	0.613901	0.326909	1.63602	-0.262049	0.0986604
1.9565	0.604203	0.27414	1.58183	-0.284297	0.0956028
1.9077	0.594301	0.226594	1.52951	-0.301924	0.0926586
1.84734	0.584019	0.182433	1.47885	-0.317464	0.0898127
1.77922	0.573078	0.141048	1.42963	-0.331677	0.087057
1.7088	0.561104	0.101915	1.38163	-0.343668	0.0843879
1.64202	0.54768	0.0644079	1.33462	-0.351375	0.0818032
1.58403	0.532473	0.0281197	1.28835	-0.352463	0.0792972
1.53804	0.515397	-0.0068217	1.2425	-0.345207	0.0768506
1.50563	0.49667	-0.0396548	1.19655	-0.329073	0.074422
1.48792	0.476799	-0.0690576	1.14968	-0.304977	0.071942
1.48636	0.456517	-0.0934705	1.10073	-0.27514	0.0693131
1.50287	0.436605	-0.111662	1.04823	-0.24261	0.0664177
1.5406	0.417652	-0.122938	0.990632	-0.210548	0.0631376
1.60175	0.399932	-0.127253	0.926673	-0.181519	0.0593801
1.68358	0.383394	-0.125308	0.855802	-0.156826	0.0551072
1.77649	0.36767	-0.118359	0.778414	-0.13631	0.0503491
1.86532	0.352028	-0.107803	0.695871	-0.118682	0.0452047
1.92953	0.335433	-0.0951127	0.610305	-0.102153	0.0398252
1.94584	0.316625	-0.0817497	0.524178	-0.0850085	0.034381
1.89451	0.294048	-0.0688546	0.439652	-0.0665722	0.0290187
1.76457	0.265833	-0.0570102	0.358221	-0.0477531	0.0238331
1.55316	0.230229	-0.0462733	0.280541	-0.03059	0.0188531
1.26456	0.185972	-0.0361532	0.206474	-0.017192	0.014046
0.907099	0.13241	-0.02571	0.13539	-0.00865176	0.00934231
0.486423	0.0698891	-0.0139336	0.0666689	-0.00403027	0.00467352
-1.2424e-17	0	0	0	0	0
-0.563954	-0.0748681	0.0167479	-0.0643759	0.00879794	-0.00466445
-1.22504	-0.152112	0.0368859	-0.125633	0.0294866	-0.00924448
-2.0052	-0.229246	0.0612678	-0.182567	0.0710243	-0.0136148
-2.92374	-0.304521	0.0916618	-0.233902	0.142619	-0.0176287
-3.99604	-0.377465	0.130703	-0.278336	0.25405	-0.0211264
-5.23153	-0.448981	0.181294	-0.314713	0.415496	-0.0239542
-6.63341	-0.521201	0.246061	-0.342104	0.635118	-0.0259785
-8.20088	-0.597405	0.326833	-0.359808	0.914065	-0.0270986
-9.92531	-0.681569	0.423708	-0.367319	1.2487	-0.027238
-11.7862	-0.777604	0.53485	-0.364626	1.62988	-0.0263684
-13.7536	-0.888669	0.657146	-0.352225	2.04291	-0.0245118
-15.7883	-1.01669	0.787164	-0.330925	2.47038	-0.0217192
-17.8452	-1.16198	0.921677	-0.301419	2.89842	-0.0180162
-19.8824	-1.32365	1.05874	-0.264075	3.31517	-0.0133866
-21.8672	-1.50063	1.19854	-0.21877	3.71175	-0.0077502
-23.7757	-1.69233	1.34301	-0.164986	4.08349	-0.000958117
-25.5941	-1.89888	1.49465	-0.102051	4.42955	0.00718871
-27.3186	-2.12122	1.65569	-0.0297949	4.75076	0.016866
-28.9537	-2.36045	1.82672	0.0510734	5.04987	0.0281739
-30.5115	-2.61677	2.00526	0.139269	5.3305	0.0411374
-32.0128	-2.8895	2.18626	0.233227	5.59547	0.0557123
-33.487	-3.17772	2.36311	0.331015	5.84564	0.0717577
-34.9702	-3.4808	2.52835	0.430155	6.08007	0.0890018
-36.4977	-3.79869	2.67497	0.528674	6.29715	0.107187
-38.0592	-4.12528	2.79613	0.623071	6.4921	0.125704
-39.6776	-4.46319	2.89056	0.712902	6.66627	0.14446
-41.1605	-4.77336	2.95208	0.789146	6.80706	0.161349
-42.709	-5.10011	2.99435	0.865773	6.942	0.17918

## Sheet: Farrokhi12_Walk
Ext(+)/Flex(-)	Add(+)/Abd(-)	Int(+)/Ext(-) Rot	Lat(+)/Med(-)	Ant(+)/Post(-)	Prox(+)/Dist(-)
-7.14088	-0.430516	1.32748	-1.14169	0.806387	-2.05447
-7.14732	-0.425742	1.32617	-1.14905	0.824653	-2.05415
-7.17443	-0.416732	1.32814	-1.16425	0.859679	-2.05666
-7.20789	-0.40895	1.33306	-1.17824	0.890389	-2.0609
-7.25732	-0.402054	1.34357	-1.19245	0.918953	-2.06871
-7.31963	-0.397524	1.35966	-1.20461	0.940505	-2.07994
-7.39225	-0.395492	1.38014	-1.21467	0.956085	-2.09401
-7.46966	-0.39616	1.4033	-1.22254	0.966902	-2.10974
-7.54779	-0.399515	1.42729	-1.22861	0.974977	-2.12618
-7.62388	-0.405329	1.45168	-1.2337	0.982485	-2.14258
-7.69816	-0.41321	1.47716	-1.23869	0.991031	-2.15885
-7.77305	-0.422453	1.50503	-1.24435	1.00183	-2.17533
-7.85205	-0.43209	1.53625	-1.2512	1.01575	-2.19256
-7.93842	-0.4411	1.5709	-1.25937	1.03323	-2.21105
-8.03407	-0.448657	1.60836	-1.26892	1.05415	-2.2311
-8.13899	-0.4543	1.64806	-1.28008	1.07774	-2.25268
-8.25146	-0.457986	1.69037	-1.29349	1.10265	-2.2755
-8.36887	-0.460037	1.73683	-1.31009	1.12723	-2.29911
-8.48882	-0.461011	1.78963	-1.33075	1.14987	-2.32316
-8.61006	-0.461608	1.85057	-1.35566	1.16937	-2.34755
-8.73292	-0.462616	1.9202	-1.38407	1.18513	-2.37249
-8.85913	-0.46488	1.99774	-1.41452	1.19718	-2.39848
-8.99111	-0.469244	2.08164	-1.44538	1.206	-2.42616
-9.13114	-0.476446	2.17057	-1.47554	1.21228	-2.4561
-9.28075	-0.486952	2.26419	-1.50485	1.21673	-2.48868
-9.44033	-0.5008	2.36324	-1.53419	1.22002	-2.52394
-9.60905	-0.517522	2.46898	-1.56488	1.22294	-2.56159
-9.78518	-0.53618	2.58224	-1.59811	1.2265	-2.60108
-9.96669	-0.555554	2.7028	-1.63447	1.23208	-2.6417
-10.1518	-0.574433	2.82907	-1.67386	1.24129	-2.68284
-10.3397	-0.591925	2.95838	-1.71578	1.2558	-2.7241
-10.5308	-0.607681	3.08774	-1.75966	1.27694	-2.76548
-10.7268	-0.62198	3.21462	-1.80524	1.30536	-2.80736
-10.9301	-0.635605	3.33746	-1.85254	1.34087	-2.85038
-11.1425	-0.649567	3.45598	-1.90176	1.38244	-2.89517
-11.365	-0.664791	3.57097	-1.95303	1.4284	-2.94214
-11.5967	-0.681838	3.68393	-2.00636	1.47681	-2.99133
-11.8359	-0.700787	3.79655	-2.06168	1.52589	-3.04245
-12.0804	-0.721339	3.91022	-2.11891	1.57437	-3.09506
-12.3292	-0.74308	4.02575	-2.17809	1.62166	-3.1489
-12.5828	-0.765746	4.14326	-2.2393	1.66793	-3.20403
-12.8432	-0.789402	4.2622	-2.30245	1.71401	-3.26086
-13.1131	-0.814403	4.38152	-2.3672	1.76109	-3.31999
-13.3947	-0.841108	4.49997	-2.43289	1.8104	-3.3819
-13.6889	-0.869513	4.61627	-2.49863	1.86292	-3.44674
-13.9944	-0.899046	4.7293	-2.56345	1.91911	-3.51414
-14.3084	-0.928638	4.83821	-2.62657	1.97883	-3.58331
-14.6269	-0.957085	4.94244	-2.68749	2.04133	-3.65326
-14.9457	-0.983606	5.04179	-2.74602	2.10537	-3.72297
-15.2607	-1.00827	5.13634	-2.8023	2.16937	-3.79165
-15.5685	-1.03209	5.22656	-2.85667	2.23158	-3.85884
-15.8671	-1.05666	5.31318	-2.90951	2.29023	-3.92442
-16.1558	-1.08363	5.3972	-2.96121	2.34373	-3.98862
-16.4358	-1.11413	5.47973	-3.01196	2.39086	-4.05194
-16.7098	-1.14834	5.56184	-3.06171	2.43094	-4.11501
-16.981	-1.18551	5.64434	-3.11023	2.46405	-4.17841
-17.2528	-1.22421	5.72763	-3.15715	2.49099	-4.24255
-17.5269	-1.26267	5.81159	-3.20216	2.51321	-4.30745
-17.8039	-1.2993	5.89559	-3.24503	2.53253	-4.37282
-18.0827	-1.33316	5.97856	-3.28578	2.55078	-4.43821
-18.3617	-1.36412	6.05924	-3.32457	2.5694	-4.50315
-18.6386	-1.39293	6.13637	-3.36165	2.58916	-4.56725
-18.9108	-1.42101	6.20902	-3.39727	2.61009	-4.63017
-19.175	-1.44986	6.27673	-3.43162	2.63156	-4.69154
-19.4279	-1.48035	6.33964	-3.46475	2.65252	-4.75081
-19.6662	-1.51238	6.39843	-3.49668	2.67185	-4.80731
-19.8877	-1.54475	6.45415	-3.52742	2.68871	-4.86036
-20.0917	-1.57553	6.508	-3.55703	2.70261	-4.90952
-20.2798	-1.60271	6.56111	-3.58563	2.71351	-4.95475
-20.455	-1.62499	6.6143	-3.61342	2.72163	-4.99643
-20.6207	-1.6422	6.66803	-3.6406	2.7273	-5.03527
-20.7802	-1.65531	6.72232	-3.66727	2.7308	-5.07215
-20.936	-1.66601	6.77686	-3.69347	2.73231	-5.1079
-21.0896	-1.6762	6.83106	-3.71908	2.73202	-5.14317
-21.242	-1.68738	6.88417	-3.74388	2.73014	-5.17841
-21.3935	-1.70051	6.9355	-3.76764	2.72705	-5.21389
-21.5444	-1.71594	6.98441	-3.7901	2.72312	-5.24969
-21.6948	-1.73376	7.03047	-3.81109	2.71864	-5.28584
-21.8445	-1.75396	7.07347	-3.83047	2.71353	-5.3223
-21.9931	-1.77659	7.11339	-3.84815	2.70733	-5.359
-22.1399	-1.80158	7.15041	-3.86412	2.69922	-5.39582
-22.2839	-1.82854	7.18492	-3.87838	2.6884	-5.43251
-22.4242	-1.85656	7.21744	-3.89107	2.67449	-5.46872
-22.5598	-1.88428	7.24859	-3.90243	2.65802	-5.50397
-22.69	-1.91008	7.27904	-3.91279	2.64052	-5.53773
-22.8146	-1.93257	7.30944	-3.92254	2.62428	-5.56961
-22.9337	-1.951	7.34029	-3.93204	2.61181	-5.59938
-23.0478	-1.96542	7.37194	-3.94156	2.60498	-5.62704
-23.1568	-1.97665	7.40458	-3.95124	2.60438	-5.65274
-23.2603	-1.9859	7.4382	-3.96114	2.60903	-5.67663
-23.3569	-1.99431	7.47272	-3.97133	2.61667	-5.69871
-23.4442	-2.0026	7.50799	-3.98195	2.62444	-5.71878
-23.5202	-2.011	7.54382	-3.99329	2.62976	-5.73653
-23.5838	-2.01947	7.57992	-4.00574	2.63116	-5.75182
-23.6363	-2.02807	7.61586	-4.01971	2.62884	-5.76496
-23.6809	-2.03702	7.65121	-4.03551	2.62413	-5.77658
-23.7213	-2.04661	7.68488	-4.05281	2.6192	-5.78749
-23.7622	-2.05739	7.71685	-4.07163	2.61582	-5.79868
-23.8011	-2.06814	7.74394	-4.08932	2.61486	-5.80933
-23.8429	-2.07994	7.7708	-4.10807	2.61536	-5.82078

## Sheet: Torry11_Drop
Ext(+)/Flex(-)	Add(+)/Abd(-)	Int(+)/Ext(-) Rot	Lat(+)/Med(-)	Ant(+)/Post(-)	Prox(+)/Dist(-)
1.19271e-15	-1.59028e-15	3.18055e-15	-6.16298e-33	-4.62223e-33	-2.22045e-16
-0.0972704	0.0336553	0.0663501	0.0139512	-0.00861661	-0.00347224
-0.303319	0.0743063	0.212826	0.0431527	-0.0284803	-0.0104481
-0.490431	0.0865302	0.354475	0.069752	-0.0483308	-0.0161916
-0.680079	0.0798153	0.511138	0.0979359	-0.071215	-0.020894
-0.838932	0.0702919	0.664916	0.124085	-0.0942167	-0.0230832
-0.960539	0.0562071	0.81735	0.147102	-0.11727	-0.0223754
-1.03835	0.0402484	0.966152	0.165338	-0.13934	-0.0187662
-1.08093	0.0429314	1.11264	0.179171	-0.159239	-0.0132828
-1.09757	0.0438879	1.25717	0.187586	-0.176731	-0.00697684
-1.1046	0.037495	1.39926	0.19174	-0.191821	-0.00112292
-1.12199	0.0237871	1.53677	0.193684	-0.204451	0.00277884
-1.16955	0.00205374	1.6661	0.195812	-0.214704	0.00332462
-1.26501	-0.0297974	1.78306	0.200433	-0.222741	-0.000692309
-1.42004	-0.0728334	1.88339	0.209069	-0.228498	-0.0100948
-1.63857	-0.126989	1.96356	0.222059	-0.231604	-0.0252482
-1.91791	-0.193322	2.0229	0.238799	-0.231782	-0.0459941
-2.24842	-0.269819	2.06399	0.258158	-0.228993	-0.0715401
-2.61079	-0.352552	2.09081	0.278493	-0.223561	-0.100254
-2.98563	-0.437739	2.10781	0.298215	-0.215925	-0.130512
-3.35935	-0.522905	2.12036	0.316543	-0.206834	-0.161009
-3.72298	-0.606595	2.13247	0.33328	-0.197067	-0.190785
-4.07292	-0.688356	2.14575	0.348547	-0.187096	-0.219404
-4.41458	-0.769354	2.16089	0.362756	-0.176939	-0.247258
-4.75513	-0.850897	2.17855	0.376191	-0.166385	-0.274939
-5.09828	-0.933668	2.19862	0.388287	-0.154774	-0.303021
-5.44486	-1.01791	2.22132	0.398059	-0.141375	-0.331926
-5.7946	-1.10377	2.24774	0.404823	-0.125811	-0.361835
-6.14574	-1.19114	2.27865	0.408345	-0.108105	-0.392638
-6.49691	-1.27992	2.31434	0.408858	-0.0885453	-0.424118
-6.84822	-1.37018	2.35448	0.407187	-0.0676889	-0.456005
-7.20046	-1.46192	2.39735	0.404353	-0.0460672	-0.488067
-7.55385	-1.55491	2.44089	0.400844	-0.0238433	-0.52022
-7.90765	-1.64893	2.48484	0.396417	-0.000874299	-0.552498
-8.26074	-1.74368	2.52922	0.390588	0.0230976	-0.584977
-8.61241	-1.83889	2.57364	0.38295	0.0483365	-0.617768
-8.96307	-1.93452	2.61778	0.373236	0.0750801	-0.651029
-9.31358	-2.03047	2.66025	0.361581	0.103402	-0.684849
-9.66364	-2.12591	2.69683	0.348676	0.133141	-0.719106
-10.0118	-2.21969	2.72303	0.33525	0.164062	-0.753573
-10.357	-2.31102	2.7364	0.321759	0.195988	-0.788091
-10.6989	-2.39955	2.73668	0.308583	0.228651	-0.82249
-11.0372	-2.48545	2.72573	0.296055	0.261664	-0.856566
-11.3748	-2.57003	2.70782	0.284152	0.294911	-0.89043
-11.7172	-2.65537	2.68833	0.272548	0.328554	-0.92445
-12.0652	-2.74252	2.67138	0.260857	0.36259	-0.958691
-12.4145	-2.831	2.65891	0.248548	0.3969	-0.992906
-12.7606	-2.91994	2.65152	0.234822	0.431646	-1.027
-13.0992	-3.0082	2.64851	0.21909	0.466986	-1.0609
-13.4249	-3.09395	2.64774	0.201388	0.502678	-1.09425
-13.7369	-3.17618	2.64698	0.182059	0.538619	-1.12698
-14.0416	-3.25564	2.64504	0.161553	0.575102	-1.15952
-14.3455	-3.33323	2.64131	0.140613	0.612174	-1.19214
-14.6497	-3.40881	2.63582	0.119932	0.64945	-1.22466
-14.9545	-3.48216	2.62855	0.0996608	0.686889	-1.25705
-15.2609	-3.55307	2.61908	0.079791	0.724629	-1.28943
-15.5671	-3.62079	2.60711	0.0604141	0.762513	-1.32161
-15.8708	-3.6847	2.59279	0.0414251	0.800455	-1.35348
-16.174	-3.74519	2.57643	0.0226193	0.838719	-1.38524
-16.478	-3.803	2.55957	0.00405794	0.877224	-1.41693
-16.7802	-3.85834	2.54448	-0.0141734	0.91548	-1.44819
-17.0775	-3.91102	2.53187	-0.032114	0.953194	-1.47879
-17.3684	-3.96049	2.52037	-0.0495012	0.990156	-1.50854
-17.6514	-4.00603	2.50768	-0.0657853	1.02607	-1.53723
-17.9269	-4.04717	2.49112	-0.0805016	1.0609	-1.56479
-18.1973	-4.08403	2.46844	-0.0933537	1.09481	-1.59138
-18.4637	-4.11708	2.43946	-0.104228	1.12783	-1.61704
-18.7254	-4.14704	2.40594	-0.11354	1.15997	-1.64181
-18.981	-4.1747	2.37016	-0.122196	1.1915	-1.66585
-19.2295	-4.20113	2.33473	-0.131257	1.22279	-1.68942
-19.472	-4.22779	2.3022	-0.141631	1.25427	-1.71286
-19.7124	-4.25649	2.27405	-0.153813	1.28642	-1.73659
-19.9557	-4.28898	2.25103	-0.167698	1.31945	-1.76087
-20.2053	-4.3267	2.23398	-0.182635	1.35309	-1.78564
-20.4611	-4.36959	2.22208	-0.197519	1.38659	-1.81043
-20.7185	-4.41577	2.21266	-0.211188	1.41903	-1.83456
-20.9696	-4.46259	2.20323	-0.222949	1.44954	-1.8573
-21.2062	-4.50734	2.19187	-0.232737	1.4776	-1.87815
-21.4223	-4.54762	2.1762	-0.241006	1.50328	-1.89703
-21.6161	-4.58265	2.15557	-0.248781	1.52724	-1.9143
-21.7906	-4.61388	2.13227	-0.257356	1.55038	-1.93063
-21.9517	-4.64371	2.10903	-0.267644	1.57353	-1.94669
-22.1068	-4.67438	2.08723	-0.27983	1.59729	-1.96301
-22.262	-4.70774	2.06802	-0.293539	1.62176	-1.97978
-22.4198	-4.74446	2.05161	-0.307962	1.64656	-1.99683
-22.5811	-4.78339	2.03479	-0.321884	1.67126	-2.01383
-22.7454	-4.82225	2.01274	-0.334115	1.69555	-2.03048
-22.9102	-4.85912	1.98305	-0.344162	1.71916	-2.04652
-23.0724	-4.89307	1.94576	-0.352168	1.74195	-2.0618
-23.2301	-4.92386	1.90197	-0.358427	1.76386	-2.07629
-23.3806	-4.95219	1.85527	-0.363412	1.78459	-2.08986
-23.5201	-4.97953	1.81097	-0.367806	1.80368	-2.10231
-23.6459	-5.00704	1.77227	-0.372003	1.82077	-2.11348
-23.7567	-5.03398	1.73987	-0.375974	1.83569	-2.1233
-23.8521	-5.0594	1.71359	-0.379823	1.84856	-2.1318
-23.9343	-5.08432	1.69151	-0.383948	1.85996	-2.13935
-24.0042	-5.10827	1.67211	-0.388445	1.87022	-2.14615
-24.0656	-5.13095	1.65419	-0.393453	1.87996	-2.15255
-24.1167	-5.15217	1.63801	-0.39845	1.8886	-2.15822
-24.1662	-5.17452	1.62157	-0.404032	1.89744	-2.16402

## Sheet: Beillas04_Hop
Ext(+)/Flex(-)	Add(+)/Abd(-)	Int(+)/Ext(-) Rot	Lat(+)/Med(-)	Ant(+)/Post(-)	Prox(+)/Dist(-)
-6.21755	-2.16404	1.3909	-0.573373	1.64487	-0.485098
-6.93013	-2.40794	1.58886	-0.613737	1.81555	-0.493874
-8.57901	-2.96457	2.0425	-0.705125	2.19361	-0.517311
-10.2041	-3.50535	2.48886	-0.802557	2.55938	-0.549489
-12.0599	-4.109	3.00115	-0.917366	2.95841	-0.597086
-13.8987	-4.69337	3.52754	-1.03336	3.33084	-0.655098
-15.7163	-5.25344	4.06833	-1.14897	3.67525	-0.73134
-17.4299	-5.76623	4.60738	-1.25684	3.98768	-0.82142
-19.0332	-6.23633	5.12966	-1.35256	4.28277	-0.923904
-20.5403	-6.67313	5.61266	-1.43561	4.58708	-1.04489
-21.9592	-7.08468	6.03788	-1.50582	4.92364	-1.17804
-23.2943	-7.47545	6.39249	-1.56424	5.29932	-1.31539
-24.5643	-7.84645	6.66957	-1.61481	5.7069	-1.45406
-25.7606	-8.18403	6.87532	-1.66445	6.12388	-1.58608
-26.8781	-8.47243	7.02556	-1.71881	6.51588	-1.70198
-27.9226	-8.70345	7.13735	-1.78297	6.85385	-1.80075
-28.9001	-8.8743	7.22557	-1.86027	7.12489	-1.88401
-29.8078	-8.98703	7.30262	-1.94976	7.32757	-1.95229
-30.6469	-9.05632	7.3755	-2.04596	7.47148	-2.01136
-31.4113	-9.09949	7.44654	-2.14142	7.57257	-2.06757
-32.0827	-9.12863	7.51615	-2.22862	7.64487	-2.12217
-32.6396	-9.15138	7.58382	-2.30129	7.69532	-2.17372
-33.0684	-9.1724	7.6479	-2.35608	7.72636	-2.22056
-33.369	-9.19188	7.70608	-2.3929	7.73817	-2.26014
-33.5594	-9.20919	7.75583	-2.41381	7.73078	-2.29084
-33.6749	-9.22616	7.79513	-2.42181	7.70585	-2.31452
-33.758	-9.2465	7.82368	-2.41989	7.66752	-2.33511
-33.8449	-9.27407	7.8437	-2.41051	7.62213	-2.35644
-33.9566	-9.31126	7.85994	-2.39564	7.57716	-2.38119
-34.0948	-9.35784	7.87861	-2.37697	7.53987	-2.41016
-34.2462	-9.41076	7.90579	-2.35635	7.51602	-2.44258
-34.3899	-9.46464	7.94565	-2.33591	7.50854	-2.4768
-34.5059	-9.51318	7.9995	-2.31779	7.51659	-2.5113
-34.5796	-9.55082	8.06596	-2.30378	7.53572	-2.54514
-34.6036	-9.57404	8.14191	-2.29495	7.55918	-2.578
-34.5762	-9.58191	8.22355	-2.29119	7.57949	-2.60959
-34.4978	-9.57614	8.30698	-2.29075	7.58935	-2.63935
-34.3677	-9.56025	8.38783	-2.28989	7.58179	-2.66624
-34.1833	-9.53845	8.46057	-2.28312	7.5499	-2.68882
-33.9419	-9.5145	8.51826	-2.26395	7.4867	-2.70557
-33.6442	-9.49103	8.55344	-2.22646	7.38604	-2.71548
-33.2971	-9.46922	8.56008	-2.1671	7.24476	-2.7183
-32.9162	-9.44914	8.53595	-2.08638	7.0655	-2.71445
-32.5241	-9.43007	8.48426	-1.98909	6.8575	-2.70493
-32.1451	-9.41074	8.41373	-1.88325	6.63552	-2.69106
-31.7996	-9.38984	8.33638	-1.77781	6.41654	-2.67411
-31.501	-9.36654	8.26413	-1.68041	6.21586	-2.65515
-31.2528	-9.34081	8.20567	-1.59575	6.04351	-2.63514
-31.0498	-9.31375	8.16455	-1.52538	5.90292	-2.61513
-30.8811	-9.28735	8.13912	-1.46846	5.79139	-2.59644
-30.7326	-9.26364	8.12433	-1.42316	5.70228	-2.58053
-30.5868	-9.24326	8.11453	-1.38773	5.62693	-2.56882
-30.4238	-9.22438	8.10583	-1.36108	5.55612	-2.56188
-30.2217	-9.20206	8.09748	-1.34257	5.48102	-2.5585
-29.9604	-9.16881	8.09164	-1.33158	5.39394	-2.55531
-29.6279	-9.11664	8.09229	-1.32702	5.28914	-2.54763
-29.2248	-9.0399	8.10337	-1.32735	5.16358	-2.53095
-28.7674	-8.93734	8.12722	-1.33102	5.01731	-2.50274
-28.2851	-8.81323	8.16355	-1.33654	4.85286	-2.46402
-27.8124	-8.67708	8.20936	-1.34252	4.67356	-2.41952
-27.3775	-8.5408	8.25987	-1.34783	4.48309	-2.37555
-26.9948	-8.41463	8.30971	-1.35101	4.28494	-2.33737
-26.6637	-8.30454	8.35421	-1.3497	4.08156	-2.30727
-26.3722	-8.21139	8.39042	-1.34139	3.87572	-2.28389
-26.1044	-8.13152	8.41758	-1.32492	3.67298	-2.26285
-25.8485	-8.05938	8.43663	-1.30005	3.47935	-2.23911
-25.6009	-7.9909	8.44939	-1.26748	3.29985	-2.20914
-25.3653	-7.92517	8.45758	-1.22929	3.13953	-2.17201
-25.148	-7.8642	8.46222	-1.18785	3.0026	-2.1293
-24.9548	-7.81169	8.46331	-1.144	2.89071	-2.08441
-24.7879	-7.77097	8.46044	-1.09813	2.80595	-2.04128
-24.6446	-7.7432	8.4535	-1.05122	2.75182	-2.00328
-24.5188	-7.72615	8.44311	-1.00487	2.73106	-1.97254
-24.4033	-7.71403	8.43054	-0.961448	2.74397	-1.94966
-24.2915	-7.69931	8.41724	-0.9241	2.78766	-1.93374
-24.1793	-7.67468	8.40402	-0.895136	2.85467	-1.92271
-24.0666	-7.63507	8.39044	-0.874611	2.93411	-1.91377
-23.9572	-7.58003	8.37499	-0.860143	3.01541	-1.9041
-23.8571	-7.51565	8.35591	-0.847646	3.09128	-1.89157
-23.773	-7.4516	8.33182	-0.832517	3.15926	-1.87511
-23.7104	-7.39797	8.3019	-0.811451	3.22178	-1.855
-23.6711	-7.36278	8.26582	-0.783423	3.28416	-1.83274
-23.6532	-7.34898	8.22347	-0.749844	3.35106	-1.81058
-23.6512	-7.35227	8.17445	-0.714017	3.42402	-1.79054
-23.6561	-7.36384	8.11823	-0.680244	3.50068	-1.77389
-23.6571	-7.3736	8.05475	-0.652472	3.57546	-1.76066
-23.6427	-7.37236	7.98476	-0.633734	3.64109	-1.74952
-23.6033	-7.35397	7.90979	-0.625659	3.69092	-1.73821
-23.5335	-7.31695	7.83209	-0.628302	3.72051	-1.72453
-23.4335	-7.2639	7.75448	-0.640279	3.72822	-1.70709
-23.3097	-7.2004	7.68028	-0.659171	3.71497	-1.6858
-23.1733	-7.13376	7.61337	-0.680882	3.68425	-1.6619
-23.0379	-7.07169	7.55816	-0.699285	3.64197	-1.63754
-22.9159	-7.02095	7.51907	-0.706969	3.59599	-1.61506
-22.8156	-6.98627	7.49945	-0.697346	3.55525	-1.59629
-22.7404	-6.9698	7.50083	-0.662981	3.52902	-1.58216
-22.6885	-6.97027	7.52084	-0.60371	3.52308	-1.57265
-22.6551	-6.98527	7.55665	-0.520293	3.54011	-1.56697
-22.635	-7.00711	7.59738	-0.429982	3.57244	-1.56405
-22.6206	-7.0349	7.64482	-0.32676	3.61729	-1.56236

## Sheet: Deneweth10_Hop
Ext(+)/Flex(-)	Add(+)/Abd(-)	Int(+)/Ext(-) Rot	Lat(+)/Med(-)	Ant(+)/Post(-)	Prox(+)/Dist(-)
-29.421	-2.11219	3.43749	-4.51606	12.3767	3.66495
-29.6769	-2.14797	3.48784	-4.55712	12.4321	3.64447
-30.2771	-2.23117	3.60033	-4.6464	12.5551	3.59705
-30.8717	-2.31308	3.70852	-4.73279	12.6748	3.55067
-31.5613	-2.40698	3.82858	-4.82851	12.8104	3.49777
-32.2712	-2.50185	3.94915	-4.92355	12.9495	3.44438
-33.0098	-2.59708	4.06814	-5.0192	13.0981	3.39018
-33.7751	-2.6899	4.18398	-5.11435	13.2591	3.33579
-34.5695	-2.77785	4.29091	-5.20802	13.4346	3.2815
-35.4141	-2.86138	4.38725	-5.29804	13.6233	3.22646
-36.3105	-2.94061	4.46949	-5.38111	13.8158	3.17092
-37.2407	-3.01587	4.53676	-5.45421	13.9968	3.116
-38.181	-3.08849	4.59117	-5.51501	14.1516	3.06284
-39.1022	-3.15967	4.63535	-5.5629	14.2701	3.01268
-39.9614	-3.2282	4.66983	-5.60034	14.35	2.96717
-40.7258	-3.29132	4.69542	-5.632	14.3988	2.92745
-41.3905	-3.34664	4.71406	-5.66245	14.4296	2.89338
-41.9672	-3.3929	4.72809	-5.69462	14.4543	2.86422
-42.4794	-3.4306	4.73987	-5.72842	14.4787	2.83884
-42.9672	-3.46261	4.75151	-5.76009	14.5027	2.81559
-43.4742	-3.49356	4.76355	-5.78398	14.5222	2.79281
-44.0271	-3.52758	4.77537	-5.79609	14.5345	2.76953
-44.6256	-3.56563	4.78497	-5.79603	14.5416	2.74592
-45.2449	-3.60544	4.79031	-5.78736	14.5496	2.72298
-45.8516	-3.64438	4.79357	-5.77668	14.5655	2.7017
-46.4115	-3.68077	4.80061	-5.77034	14.5924	2.68272
-46.8912	-3.71359	4.81568	-5.7701	14.6238	2.66665
-47.27	-3.74369	4.84002	-5.77346	14.6446	2.65367
-47.5443	-3.77379	4.87344	-5.77622	14.637	2.64337
-47.7151	-3.80567	4.91254	-5.77361	14.5876	2.63551
-47.7865	-3.83902	4.95159	-5.76197	14.4935	2.63013
-47.7806	-3.87242	4.98661	-5.74258	14.3655	2.6268
-47.7346	-3.9038	5.0163	-5.72046	14.2257	2.62471
-47.687	-3.93068	5.03939	-5.70035	14.0986	2.6231
-47.6703	-3.95111	5.05393	-5.68411	14.0028	2.62146
-47.7028	-3.96423	5.05794	-5.67245	13.945	2.61943
-47.7794	-3.97014	5.05082	-5.66416	13.92	2.61712
-47.8757	-3.96961	5.03398	-5.65643	13.9158	2.61518
-47.962	-3.96359	5.01084	-5.64642	13.9176	2.61427
-48.0169	-3.95304	4.98591	-5.63435	13.9139	2.61466
-48.0346	-3.93911	4.96321	-5.62152	13.9017	2.61623
-48.0256	-3.92337	4.94463	-5.6089	13.8841	2.61855
-48.0096	-3.90803	4.9298	-5.59681	13.8645	2.62094
-48.0036	-3.89558	4.91768	-5.58579	13.8458	2.62277
-48.0142	-3.8881	4.90772	-5.5757	13.8307	2.62371
-48.0385	-3.8865	4.90027	-5.56582	13.8201	2.62387
-48.0682	-3.88989	4.89656	-5.55652	13.8158	2.62354
-48.0965	-3.89585	4.89812	-5.55045	13.8238	2.62299
-48.1281	-3.90159	4.90581	-5.5502	13.8529	2.62231
-48.1768	-3.90519	4.91973	-5.55722	13.9089	2.62129
-48.2528	-3.90643	4.9401	-5.57216	13.9888	2.61958
-48.3542	-3.90667	4.96761	-5.59328	14.079	2.61705
-48.4655	-3.90789	5.0031	-5.61578	14.1593	2.61396
-48.5566	-3.91113	5.04742	-5.63471	14.2087	2.61103
-48.5919	-3.91568	5.10045	-5.64689	14.2125	2.60916
-48.5485	-3.91892	5.15938	-5.65185	14.1705	2.60916
-48.4257	-3.91715	5.21801	-5.65156	14.0966	2.61143
-48.2426	-3.90702	5.26736	-5.64801	14.0101	2.61597
-48.0328	-3.88712	5.29637	-5.64146	13.9283	2.62235
-47.8361	-3.85868	5.29319	-5.63114	13.8625	2.62966
-47.6861	-3.82535	5.24713	-5.61442	13.8136	2.63681
-47.6025	-3.79226	5.15083	-5.58796	13.7727	2.64282
-47.5895	-3.76445	5.00222	-5.55096	13.7271	2.64688
-47.636	-3.74517	4.80637	-5.50576	13.6657	2.64861
-47.7186	-3.73464	4.5766	-5.45587	13.5823	2.64833
-47.8063	-3.73006	4.3335	-5.40511	13.4774	2.64696
-47.8686	-3.72707	4.10162	-5.35681	13.3568	2.64573
-47.8826	-3.72222	3.90435	-5.31334	13.2287	2.64565
-47.8366	-3.7145	3.75919	-5.27588	13.1004	2.64726
-47.7289	-3.70539	3.67419	-5.24427	12.9739	2.65062
-47.5656	-3.69802	3.64675	-5.21709	12.8465	2.6554
-47.358	-3.69531	3.6652	-5.19238	12.7161	2.66114
-47.1145	-3.6968	3.7131	-5.16824	12.5829	2.66776
-46.8404	-3.69853	3.77329	-5.14342	12.4512	2.67552
-46.5445	-3.69606	3.8308	-5.11764	12.3281	2.68463
-46.2408	-3.68647	3.87513	-5.09127	12.2198	2.69494
-45.9425	-3.66907	3.90124	-5.06531	12.1275	2.70603
-45.6639	-3.64665	3.9085	-5.0403	12.0484	2.71711
-45.4172	-3.6244	3.89909	-5.01623	11.9772	2.72728
-45.2055	-3.60624	3.87672	-4.99252	11.9064	2.736
-45.022	-3.5933	3.84516	-4.96951	11.8343	2.74334
-44.8577	-3.58465	3.80683	-4.94809	11.7643	2.74963
-44.703	-3.57776	3.76267	-4.92882	11.7003	2.75541
-44.5469	-3.56934	3.71279	-4.9107	11.6425	2.76138
-44.3842	-3.55696	3.65674	-4.89259	11.5907	2.768
-44.2148	-3.53941	3.59397	-4.87299	11.5423	2.77545
-44.0386	-3.51575	3.5248	-4.85096	11.4929	2.7838
-43.8548	-3.48472	3.4504	-4.82716	11.4409	2.79312
-43.6654	-3.44503	3.37229	-4.80399	11.3919	2.80333
-43.4709	-3.39516	3.29249	-4.78455	11.3557	2.81448
-43.2702	-3.33401	3.21331	-4.77202	11.3415	2.82662
-43.0621	-3.26168	3.13712	-4.76748	11.355	2.83985
-42.8484	-3.18028	3.06591	-4.76914	11.3963	2.85414
-42.638	-3.09447	3.001	-4.77324	11.4587	2.86901
-42.4403	-3.01062	2.94358	-4.77522	11.5288	2.88372
-42.2693	-2.93556	2.89387	-4.7688	11.5934	2.89743
-42.1289	-2.87473	2.85289	-4.75123	11.6396	2.90946
-42.0276	-2.83096	2.81917	-4.72066	11.6625	2.91925
-41.965	-2.80485	2.79394	-4.68357	11.6642	2.92629
-41.915	-2.78635	2.77157	-4.63919	11.6525	2.93256

## Sheet: Kozanek11_Stair
Ext(+)/Flex(-)	Add(+)/Abd(-)	Int(+)/Ext(-) Rot	Lat(+)/Med(-)	Ant(+)/Post(-)	Prox(+)/Dist(-)
-43.6961	-4.3441	-0.521956	-1.59562	6.02211	0.444619
-43.4191	-4.37769	-0.455829	-1.56894	5.93461	0.459766
-42.8176	-4.44526	-0.313381	-1.51621	5.75035	0.489122
-42.2451	-4.50455	-0.178167	-1.46939	5.57919	0.514631
-41.6271	-4.56126	-0.0339923	-1.42552	5.40204	0.537542
-41.0452	-4.60556	0.0984482	-1.39397	5.24596	0.552445
-40.4979	-4.63727	0.218494	-1.37554	5.11169	0.558792
-39.9977	-4.65548	0.322571	-1.37115	5.0032	0.556081
-39.5399	-4.66112	0.411435	-1.37956	4.9189	0.545048
-39.1181	-4.65536	0.486627	-1.39877	4.85617	0.526873
-38.7253	-4.63929	0.54976	-1.42676	4.81239	0.502751
-38.355	-4.61384	0.602497	-1.46144	4.78498	0.473892
-38.0005	-4.57989	0.646534	-1.5007	4.77136	0.441511
-37.655	-4.53823	0.683586	-1.54242	4.76896	0.406825
-37.3118	-4.48957	0.715379	-1.58446	4.77522	0.371047
-36.9642	-4.4346	0.743629	-1.62467	4.78757	0.335383
-36.6057	-4.37395	0.770009	-1.66093	4.80348	0.301008
-36.2301	-4.30819	0.796083	-1.69125	4.8205	0.269037
-35.8318	-4.23789	0.823219	-1.71386	4.83633	0.240469
-35.4065	-4.16361	0.852476	-1.72737	4.84896	0.216125
-34.9513	-4.08592	0.884481	-1.73095	4.85671	0.196575
-34.4656	-4.00543	0.91936	-1.72441	4.85841	0.182092
-33.9506	-3.92281	0.956724	-1.70828	4.85334	0.17264
-33.4094	-3.83884	0.995721	-1.68374	4.84122	0.167897
-32.8468	-3.7544	1.03514	-1.65252	4.82216	0.167309
-32.2689	-3.67047	1.07356	-1.61677	4.79651	0.170165
-31.6819	-3.5881	1.10949	-1.57879	4.76474	0.175679
-31.0926	-3.50839	1.14156	-1.54095	4.72738	0.183046
-30.5069	-3.43237	1.1686	-1.50542	4.68487	0.1915
-29.93	-3.36093	1.18983	-1.47404	4.63759	0.200353
-29.3657	-3.29466	1.20499	-1.44815	4.58574	0.209026
-28.8161	-3.2338	1.21433	-1.42845	4.52934	0.21706
-28.2819	-3.17818	1.2187	-1.41499	4.46823	0.224126
-27.7617	-3.12718	1.21943	-1.40718	4.40207	0.230008
-27.2533	-3.07982	1.21826	-1.40391	4.33039	0.234586
-26.7532	-3.03483	1.21715	-1.4037	4.25262	0.237803
-26.2576	-2.99077	1.21817	-1.40486	4.16813	0.239643
-25.7623	-2.94611	1.22331	-1.4057	4.07636	0.240112
-25.2637	-2.89938	1.23433	-1.40466	3.97686	0.239235
-24.7584	-2.84924	1.25269	-1.40052	3.86942	0.237052
-24.2437	-2.79466	1.27931	-1.39253	3.75412	0.233631
-23.7178	-2.73494	1.3146	-1.38056	3.63147	0.229067
-23.1798	-2.66978	1.35838	-1.3651	3.50238	0.223493
-22.6295	-2.59931	1.40996	-1.34724	3.36811	0.217077
-22.0676	-2.52398	1.46825	-1.32861	3.23029	0.210019
-21.4952	-2.44456	1.5319	-1.3112	3.0907	0.202549
-20.9134	-2.36196	1.5994	-1.29717	2.95125	0.194921
-20.324	-2.2772	1.66919	-1.28866	2.81377	0.187403
-19.7284	-2.19125	1.73963	-1.28755	2.67996	0.180281
-19.1284	-2.10501	1.80904	-1.29524	2.55118	0.173842
-18.5259	-2.01918	1.8756	-1.3124	2.42838	0.168373
-17.9229	-1.93425	1.93735	-1.33882	2.31199	0.164154
-17.3215	-1.85047	1.99211	-1.37334	2.20192	0.161443
-16.7242	-1.76788	2.03752	-1.41391	2.09757	0.160478
-16.1335	-1.68639	2.07106	-1.45775	1.99796	0.161467
-15.5519	-1.60584	2.09008	-1.50156	1.90182	0.164591
-14.9821	-1.52608	2.09196	-1.54181	1.80777	0.169992
-14.4265	-1.44704	2.07431	-1.57502	1.71439	0.177757
-13.8872	-1.36875	2.03519	-1.59799	1.62042	0.187892
-13.3658	-1.29136	1.97354	-1.60813	1.52477	0.200289
-12.8631	-1.21515	1.88948	-1.6037	1.42673	0.214691
-12.3792	-1.14048	1.78462	-1.58398	1.32596	0.230669
-11.9128	-1.06776	1.66208	-1.5493	1.22258	0.247629
-11.4621	-0.997364	1.52646	-1.50095	1.11713	0.264823
-11.0245	-0.92963	1.38356	-1.44104	1.01054	0.281391
-10.5967	-0.864775	1.23999	-1.37216	0.904034	0.296401
-10.1753	-0.802881	1.10274	-1.29716	0.799024	0.308913
-9.75691	-0.743886	0.978662	-1.21888	0.697023	0.318031
-9.33853	-0.6876	0.873963	-1.13997	0.599526	0.322978
-8.91764	-0.633733	0.793676	-1.0627	0.507901	0.323167
-8.49258	-0.58196	0.741101	-0.988812	0.423283	0.318282
-8.06268	-0.531989	0.717469	-0.919494	0.34649	0.308321
-7.62834	-0.483644	0.721829	-0.85532	0.277983	0.293617
-7.19093	-0.436935	0.751178	-0.79632	0.217869	0.274811
-6.7526	-0.392114	0.800818	-0.742083	0.165946	0.252798
-6.31607	-0.349699	0.864903	-0.691906	0.121794	0.228648
-5.88432	-0.310452	0.936992	-0.644931	0.0848462	0.203518
-5.46038	-0.27532	1.01055	-0.600256	0.0544653	0.178566
-5.04712	-0.245336	1.07942	-0.557033	0.0299883	0.154882
-4.64708	-0.221476	1.13822	-0.514537	0.0107606	0.133404
-4.26235	-0.204506	1.18271	-0.472227	-0.00384678	0.114852
-3.89448	-0.19484	1.20999	-0.429775	-0.0144263	0.0996851
-3.54444	-0.192459	1.21858	-0.387077	-0.0215283	0.0880853
-3.2127	-0.196879	1.2083	-0.344242	-0.0256587	0.0799718
-2.89926	-0.207194	1.18007	-0.301553	-0.027283	0.0750439
-2.60386	-0.222161	1.13551	-0.259416	-0.0268337	0.0728465
-2.32602	-0.240304	1.0767	-0.218307	-0.0247181	0.0728284
-2.06518	-0.259993	1.00588	-0.178744	-0.0213247	0.0743859
-1.82073	-0.279501	0.925387	-0.141257	-0.0170277	0.0768926
-1.59205	-0.29704	0.837511	-0.106381	-0.0121895	0.0797142
-1.3785	-0.310777	0.744529	-0.0746528	-0.00716164	0.082212
-1.17941	-0.318838	0.648696	-0.0466129	-0.00228521	0.0837437
-0.994122	-0.319312	0.552249	-0.0228037	0.00210801	0.0836648
-0.82195	-0.310264	0.457409	-0.00377117	0.00569415	0.0813308
-0.662198	-0.289734	0.366389	0.00993612	0.00815547	0.0760991
-0.51394	-0.25637	0.280925	0.0179971	0.00926094	0.0675105
-0.378333	-0.211096	0.203441	0.0205595	0.00895262	0.0557291
-0.25287	-0.154279	0.133596	0.0180642	0.00726692	0.0408184
-0.147626	-0.096197	0.0767846	0.0125596	0.00484441	0.0254902
-0.0438093	-0.0318105	0.0220103	0.00478667	0.00176439	0.00844604

[truncated: 7 more sheets: Li12_Stair, Reinschmidt96_Run, Tashman04_Run, Tashman07_Run, Li12_Run, Benoit06_Cut, Miranda13_Cut]
